# Supplementary material
Source: PubMed Central journal article supplement (PMC5388819)

## SUPPLEMENTARY INFORMATION

### **Tail-Anchored Inner Membrane Protein ElaB Increases Resistance to Stress While Reducing Persistence in *Escherichia coli***

Yunxue Guo<sup>1</sup>, Xiaoxiao Liu<sup>1</sup>, Baiyuan Li<sup>1,2</sup>, Jianyun Yao<sup>1,2</sup>, Thomas K. Wood<sup>3,4</sup>, and Xiaoxue Wang<sup>1\*</sup>

<sup>1</sup>Key Laboratory of Tropical Marine Bio-resources and Ecology, Guangdong Key Laboratory of Marine  
Materia Medica, RNAM Center for Marine Microbiology, South China Sea Institute of Oceanology,  
Chinese Academy of Sciences, Guangzhou 510301, China, <sup>2</sup>University of Chinese Academy of Sciences,  
Beijing 100049, China,

<sup>3</sup>Department of Chemical Engineering and the <sup>4</sup>Department of Biochemistry and Molecular Biology,  
Pennsylvania State University, University Park, PA 16802-4400, USA

\*To whom correspondence should be addressed. Tel: +86 20 89267515; Fax: +86 20 89235490; Email:  
xxwang@scsio.ac.cn

**Running title:** ElaB is a stress-related inner membrane protein

**Keywords:** C-tail anchored membrane protein, oxidative stress, heat shock, persistence

**Table S1.** Oligonucleotides used for qRT-PCR, cloning and EMSA probe amplifying. f indicates forward primer and r indicates reverse primer, M indicates mutant. P and MP indicate promoter and mutant promoter, respectively.

| <b>Purpose/Name</b>            | <b>Sequence (5'-3')</b>                                                                    |
|--------------------------------|--------------------------------------------------------------------------------------------|
| <b>QRT-PCR</b>                 |                                                                                            |
| <i>elaB</i> -f                 | ACGACCTGACGCTGCTTAGT                                                                       |
| <i>elaB</i> -r                 | AGCACGATAAACTGCCTGCT                                                                       |
| <i>oxyR</i> -f                 | TGAGGTGAAAGTCCTTAAAGAGATG                                                                  |
| <i>oxyR</i> -r                 | GTCTGTGCTTCATGCAGATACATT                                                                   |
| <i>rrsG</i> -f                 | TATTGCACAATGGGCGCAAG                                                                       |
| <i>rrsG</i> -r                 | ACTTAACAAACCGCCTGCGT                                                                       |
| <b>Cloning</b>                 |                                                                                            |
| pHGE-f                         | CACCTCGCTAACGGATTACCC                                                                      |
| pHGE-r                         | CCAATACGCAAACCGCCTC                                                                        |
| pHGE- <i>gfp</i> -f1           | GGAATTCATGAGTAAAGGAGAAGAACTTTTC                                                            |
| pHGE- <i>gfp</i> -f2           | ATGGCTAGCAAAGGAGAAGAACTTTTC                                                                |
| pHGE- <i>gfp</i> -r            | CGGATCC TTATTTGTAGAGCTCATCCATGCC                                                           |
| pHGE- <i>elaB</i> -f           | GGAATTCATGTCTAATCAGTTTGGTGATACA                                                            |
| pHGE- <i>elaB</i> -r           | AAAGTTCTTCTCCTTTGCTAGCCATACGGCGTGCCAGCAACAGTCCTAGT                                         |
| pET28b- <i>rpoS</i> -f         | CTAGTCTAGAGTTTAACTTTAAGAAGGAGATATAATG<br>AGTCAGAATACGCTGAAAGTTC                            |
| pET28b- <i>rpoS</i> -r         | CCCAAGCTTTTAGTGATGATGATGATGATGCTCGCGG<br>AACAGCGCTTCGATATTCAGCC                            |
| <i>mCherry</i> -f              | AAGGAATTGGTGTGGGCGCGGCCGTTGGGCTGGTACTAGGACTGTTGCTGG<br>CACGCCGTGTGAGCAAGGGCGAGGAGGATAACATG |
| <i>mCherry</i> -r              | GAAGCAGCTCCAGCCTACACTTACTTGTACAGCTCGTCCA                                                   |
| <i>mCherry</i> -KM-f           | TGGACGAGCTGTACAAGTAAGTGTAGGCTGGAGCTGCTTC                                                   |
| KM-r                           | GCCTCACATTATACGGGGTACTACAAAAAAATGCAGTACCCCGGTGTA<br>GGGAGGTTTCCATATGAATATCCTCCTTAGTTCC     |
| <i>gfp</i> -f                  | AAGGAATTGGTGTGGGCGCGGCCGTTGGGCTGGTACTAGGACTGTTGCT<br>GGCACGCCGTAGTAAAGGAGAAGAACTTTTCACTGGA |
| <i>gfp</i> -r                  | GCCTCACATTATACGGGGTACTACAAAAAAATGCAGTACCCCGGTGTA<br>GGGAGGTTTCCATATGAATATCCTCCTTAGTTCC     |
| conf-f                         | GGCGAAGCAGGCAGTTTATC                                                                       |
| conf-r                         | GGAATCTCTTGCGACAAATGG                                                                      |
| pHGR01-f                       | CGTCAATTATTACCTCCACG                                                                       |
| pHGR01-r                       | GTGCTGCAAGGCGATTAAG                                                                        |
| pHGR01- <i>PelaB</i> -f        | CCGGAATTCGAGCCGGTCGTTATAGGTCGGGT                                                           |
| pHGR01- <i>PelaB</i> -r        | CCCAAGCTTGTAATCATGGTCATTCTCGTTCTCCATTTGC                                                   |
| pHGR01-<br>MP <i>PelaB</i> -r2 | GGGGGGGGGGCAAGGGTTGTTGATTACGTTTTTTTTTACCTCGCG<br>TGCCATCCCAATGTG                           |
| pHGR01-                        | TCTCGTTCTCCATTTGCGTAAAACCTGTCACGGGGGGGGGGCAA                                               |

|                         |                            |
|-------------------------|----------------------------|
| MPelaB-r3               | GGGTTGTTGATTACG            |
| <b>Probe amplifying</b> |                            |
| PelaB-rpoS2-f           | TCGGGGCGCAGGCCGCATCTG      |
| PelaB-rpoS2-r           | TCTCGTTCTCCATTTGCGT        |
| PelaB-rpoS1-f           | CGGTGTTTGTGTGTCGAGCAGAATTG |
| PelaB-rpoS1-r           | TTCACTGACAATCACCCGACCTAT   |

---

**Figure S1.** Localization of GFP-ElaB protein. Left panels are phase contrast images and middle panels are fluorescence images. The right panels are the merged images of the first two panels. Cells were induced with 0.5 mM IPTG for 2 h at OD<sub>600</sub> 1.0. Three independent cultures were used and only one representative figure is shown here.

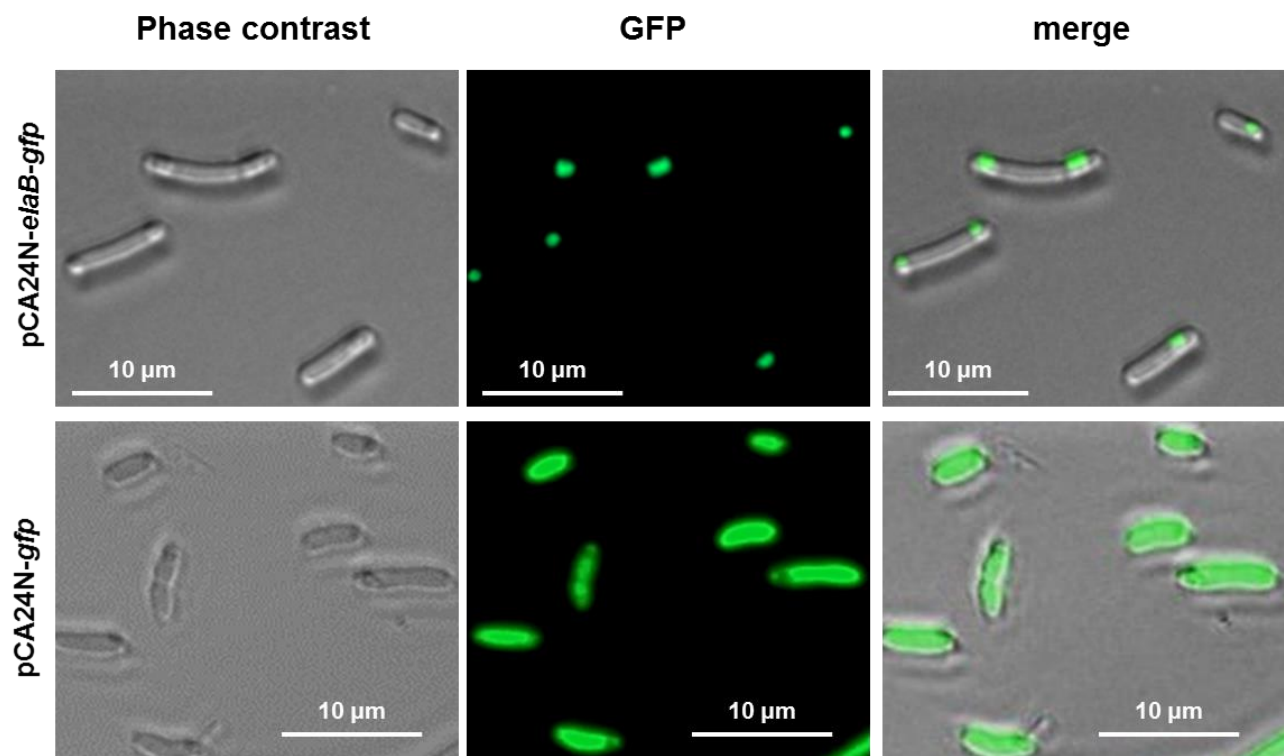

Supplement: JB.00057-17_zjb999094377s1.pdf [file JB.00057-17_zjb999094377s1.pdf]
